# Supplementary material for: β-Amyloid is associated with aberrant metabolic connectivity in subjects with mild cognitive impairment
Source: PubMed Central journal article supplement (PMC4083380; doi:10.1038/jcbfm.2014.66), 2014-04-16
Supplement: jcbfm201466x1.pdf [file jcbfm201466x1.pdf]

## Supplementary Figures

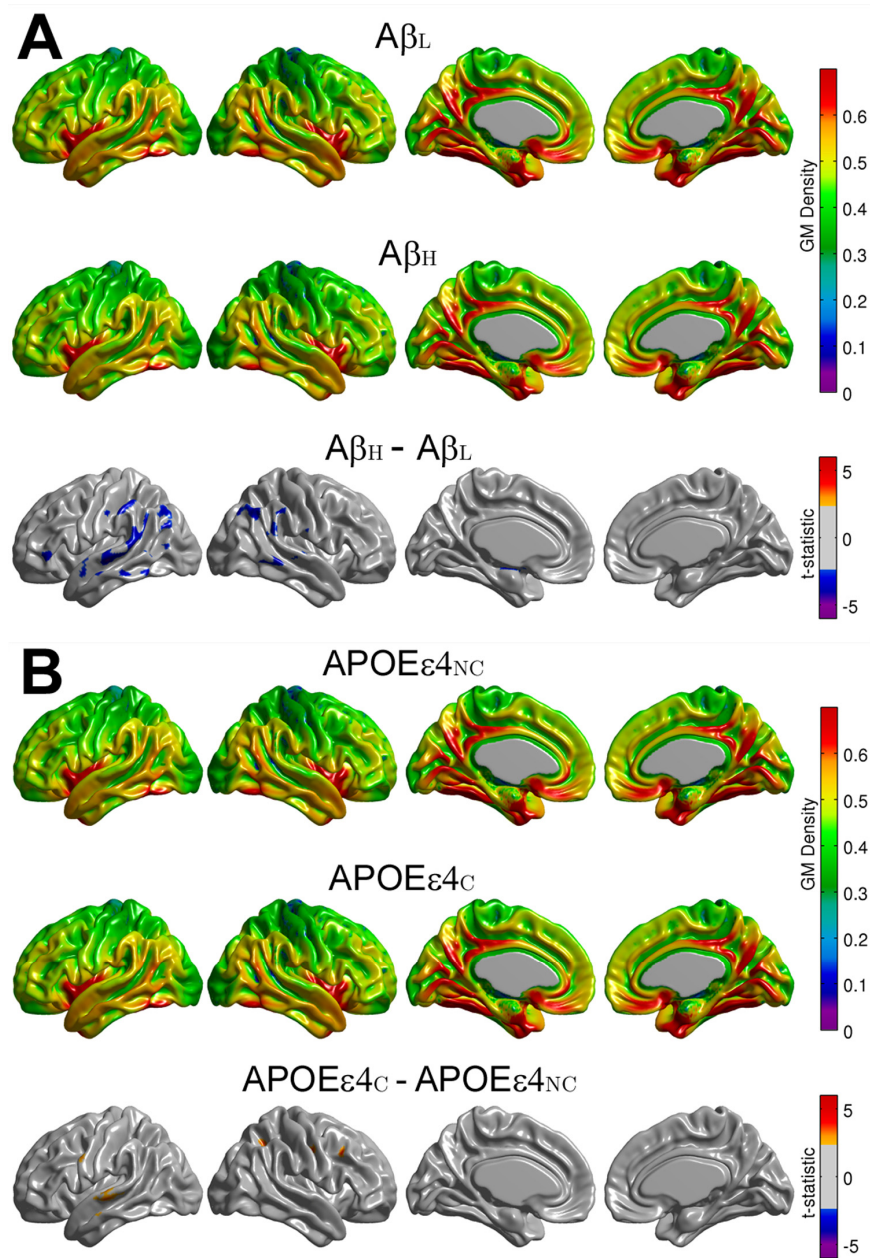

**Supplementary Figure 1.** Representative surface views of the GM density maps and thresholded ( $\alpha = 0.05$ ) t-statistic maps corresponding to the main effects of amyloid status and APOE  $\epsilon 4$  genotype on the gray matter density. The  $A\beta_H$  group showed significantly reduced GM density in the lateral temporal and inferior parietal regions (A). The main effect of APOE  $\epsilon 4$  genotype did not reveal marked group differences (B).

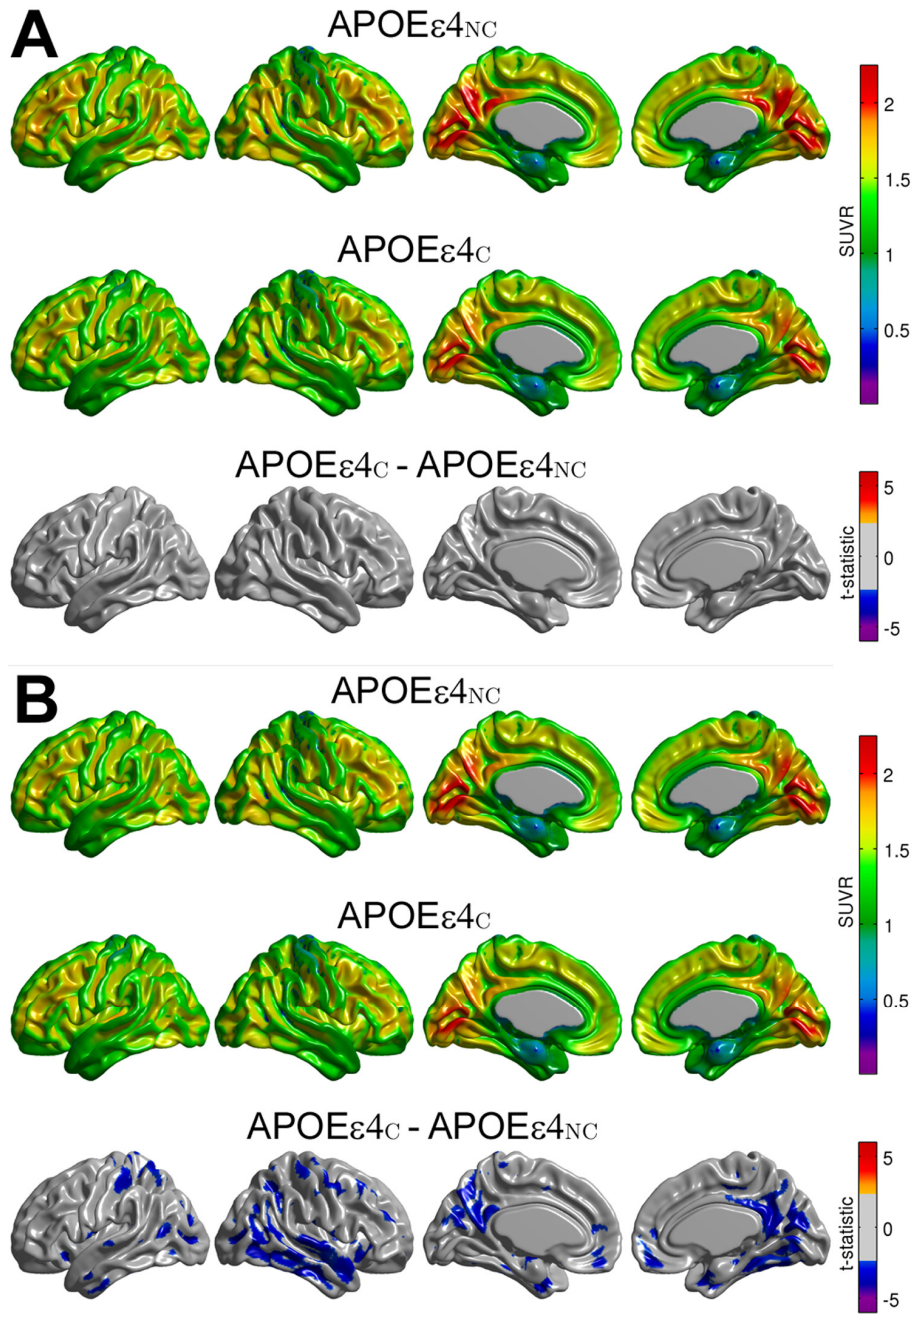

**Supplementary Figure 2.** Statistical comparison between the APOE $\epsilon$ <sub>4</sub><sub>NC</sub> and APOE $\epsilon$ <sub>4</sub><sub>C</sub> groups corresponding to A $\beta$ <sub>L</sub> (A) and A $\beta$ <sub>H</sub> (B) groups (*i.e.* ANOVA interaction terms). Note the absence of significant APOE  $\epsilon$ -related differences in the A $\beta$ <sub>L</sub> group, while the APOE $\epsilon$ <sub>4</sub><sub>C</sub> group shows significant regional hypometabolism relative to the APOE $\epsilon$ <sub>4</sub><sub>NC</sub> group in the A $\beta$ <sub>H</sub> group interaction term.

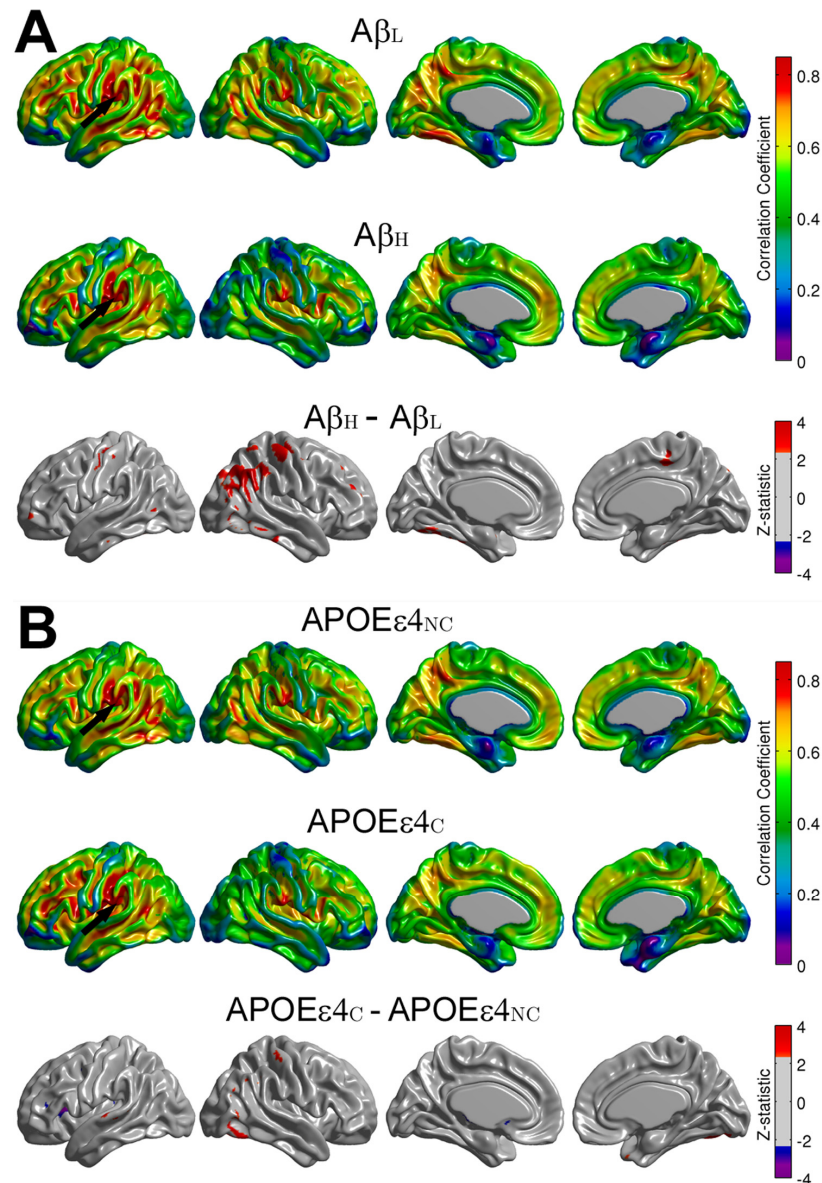

**Supplementary Figure 3.** Seed-based correlation maps for the Left Supramarginal Gyrus. Maps are provided for the  $A\beta_L$  group,  $A\beta_H$  group, and thresholded Z-statistic for the  $A\beta_L$  vs.  $A\beta_H$  group differences (A). The arrows indicate the seed region. The  $A\beta_H$  group showed reduced correlations relative to the  $A\beta_L$  group, especially between the seed and the right lateral parietal lobe. Seed-based correlation maps for  $APOE\epsilon_{4NC}$  group,  $APOE\epsilon_{4C}$  group, and thresholded Z-statistic for the  $APOE\epsilon_{4NC}$  vs.  $APOE\epsilon_{4C}$  group differences are shown in (B). Only a few small clusters showing statistically significant differences are observable.

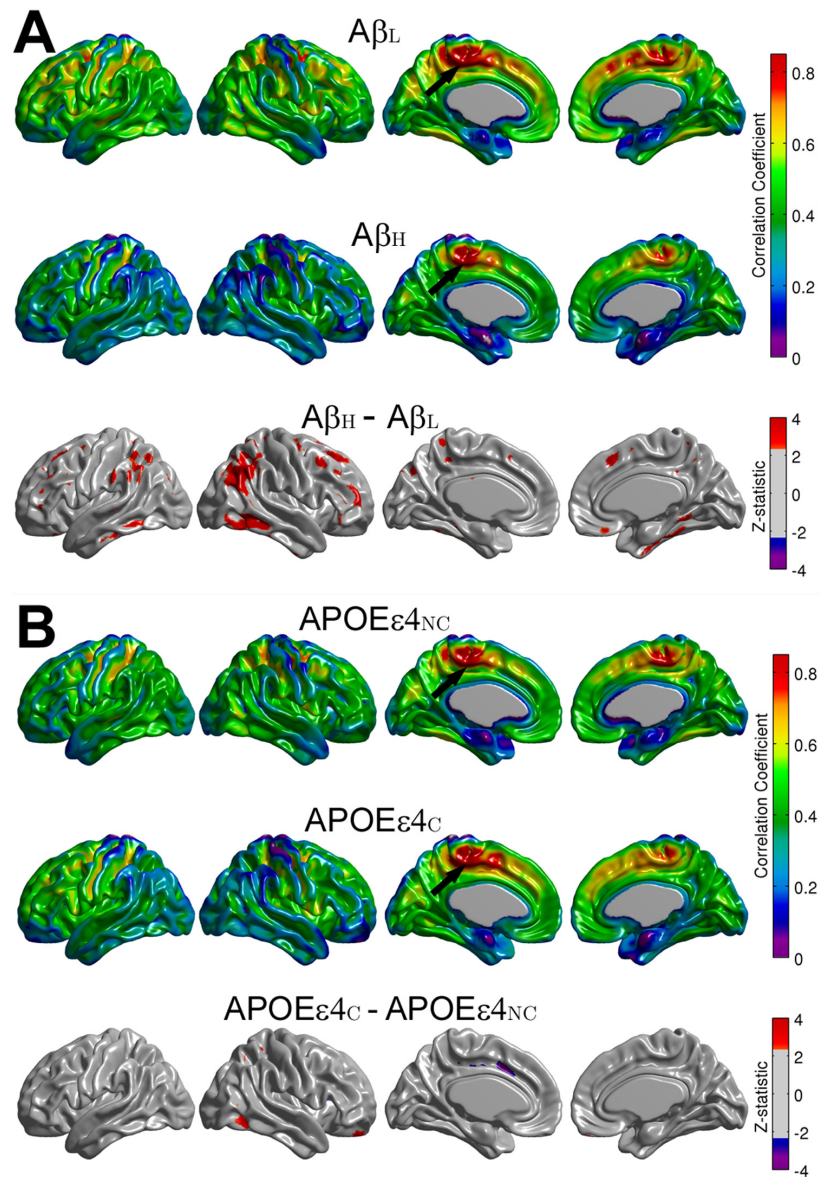

**Supplementary Figure 4.** Seed-based correlation maps for the Left Paracentral Lobule.

Maps are provided for the  $A\beta_L$  group,  $A\beta_H$  group, and thresholded Z-statistic for the  $A\beta_L$  vs.

$A\beta_H$  group differences (A). The arrows indicate the seed region. The  $A\beta_H$  group showed

reduced correlations relative to the  $A_L$  group, especially between the seed and the inferior

temporal gyrus and lateral parietal lobe. Maps for  $APOE\epsilon_{4NC}$  group,  $APOE\epsilon_{4C}$  group, and

thresholded Z-statistic of the  $APOE\epsilon_{4NC}$  vs.  $APOE\epsilon_{4C}$  group differences are provided in (B).

Only a few small clusters showing statistically significant differences between the  $APOE\epsilon_{4NC}$  and  $APOE\epsilon_{4C}$  groups.
